# Supplementary material for: Opposing trends in the peak and low ozone concentrations in eastern China: anthropogenic and meteorological influences
Source: Copernicus journal article supplement (doi:10.5194/acp-25-347-2025), 2025-01-09
Supplement: Supplementary file 1 [file acp-25-347-2025-supplement.pdf]

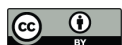

*Supplement of*

## **Opposing trends in the peak and low ozone concentrations in eastern China: anthropogenic and meteorological influences**

**Zhuang Wang et al.**

*Correspondence to:* Chengzhi Xing (xingcz@aiofm.ac.cn), Yujia Chen (chenyj18@mail.ustc.edu.cn), and Cheng Liu (chliu81@ustc.edu.cn)

The copyright of individual parts of the supplement might differ from the article licence.

Figures:

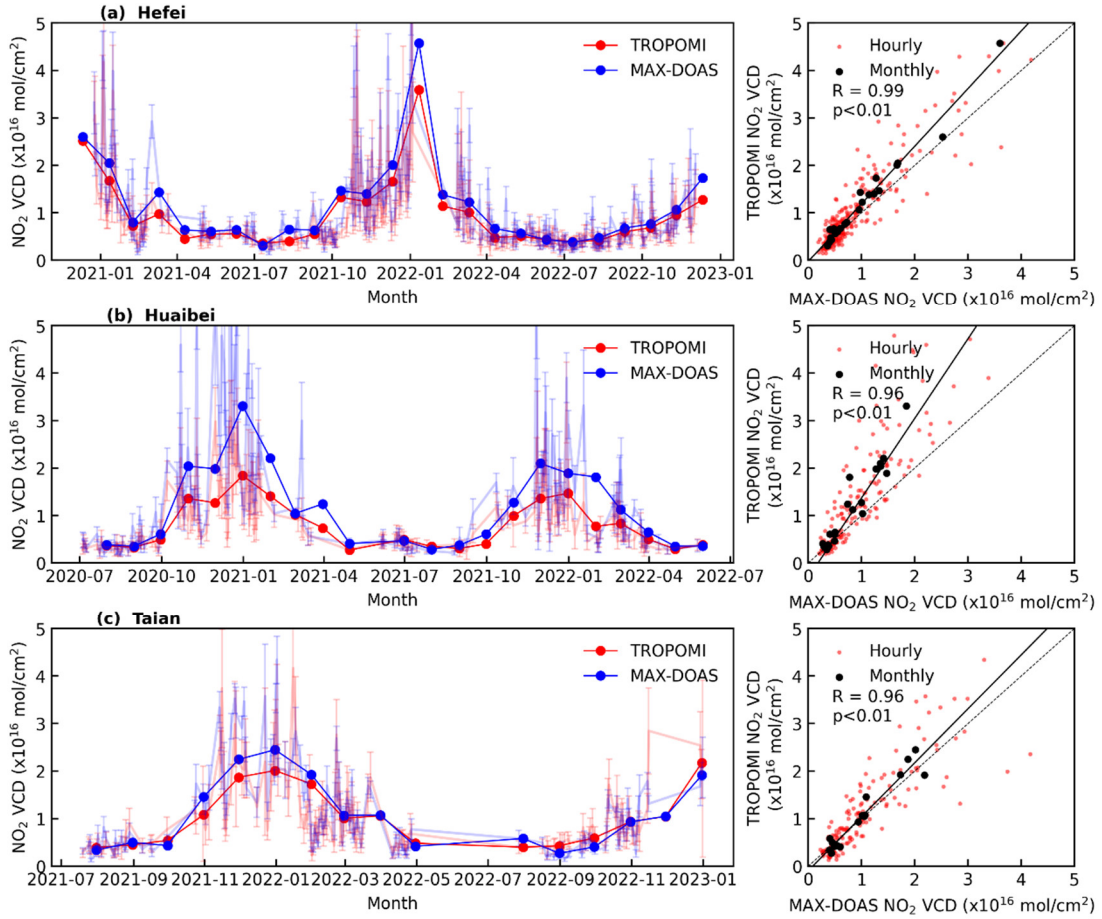

5 **Fig.S1.** Time series comparison (left panel) and scatter plot comparison (right panel) of monthly mean TROPOMI and MAX-DOAS NO<sub>2</sub> VCD during the whole observation period in (a) Hefei, (b) Huaibei, and (c) Tai'an, respectively. The light red and light blue dots in left panel represent the TROPOMI and MAX-DOAS observed hourly values, respectively, and the solid red and solid blue dots represent the TROPOMI and MAX-DOAS observed monthly mean values, respectively. The vertical bar in hourly values represents errors.

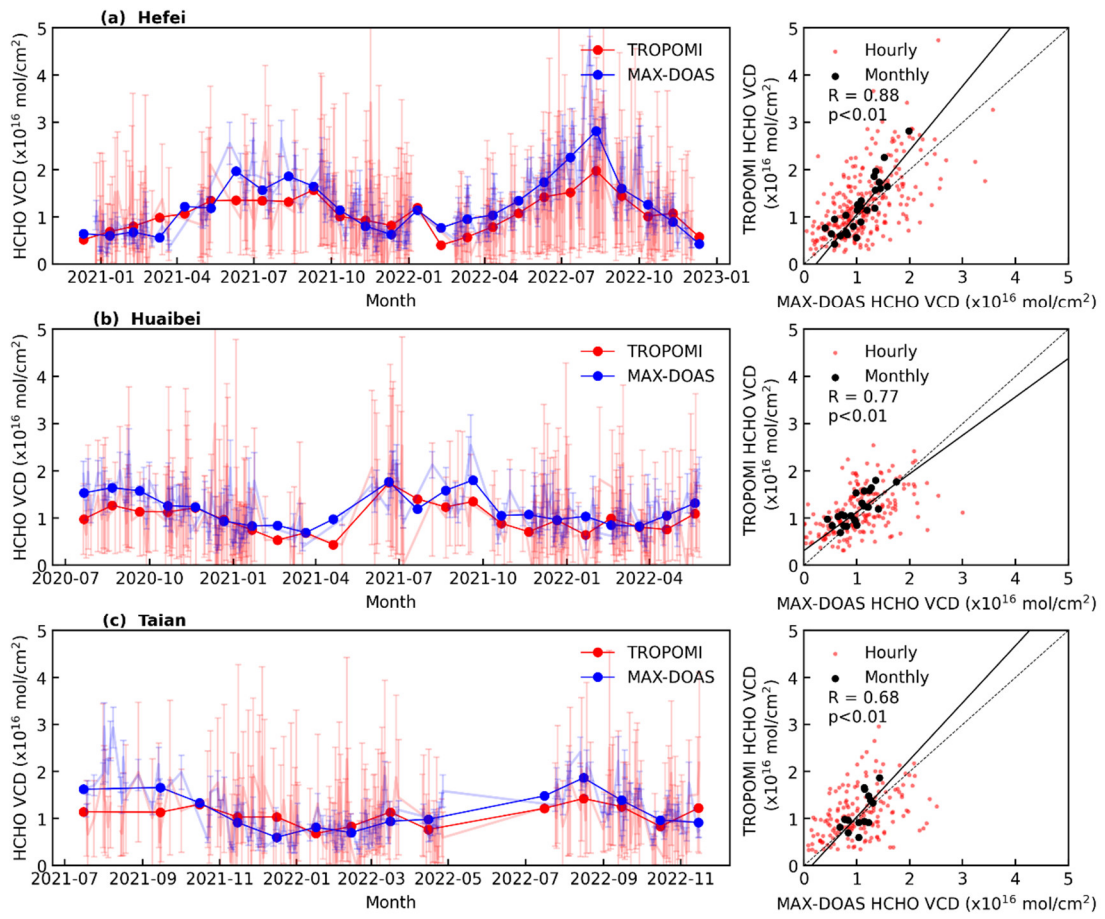

**Fig.S2.** The same as Fig.S1 but for HCHO VCD comparison.

5

10

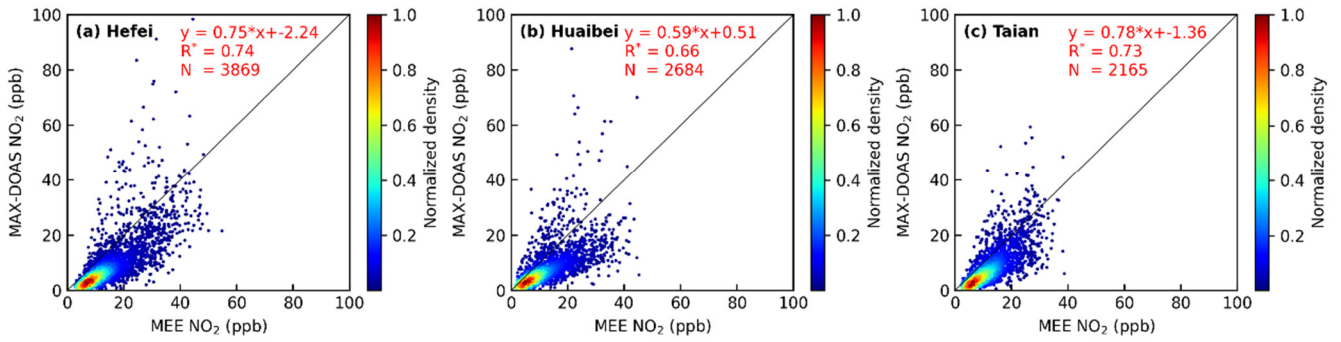

Fig.S3. Scatter plots show the correlation between the surface hourly NO<sub>2</sub> concentrations observed by Ministry of Ecology and Environment of China (MEE) and ground-based MAX-DOAS in (a) Hefei, (b) Huaibei, and (c) Tai'an during the whole observation period. The linear fitting function and correlation coefficient are show at the top of each panel, N=number of samples, and the superscript asterisk indicates P<0.01. Here, the color bar indicates the density.

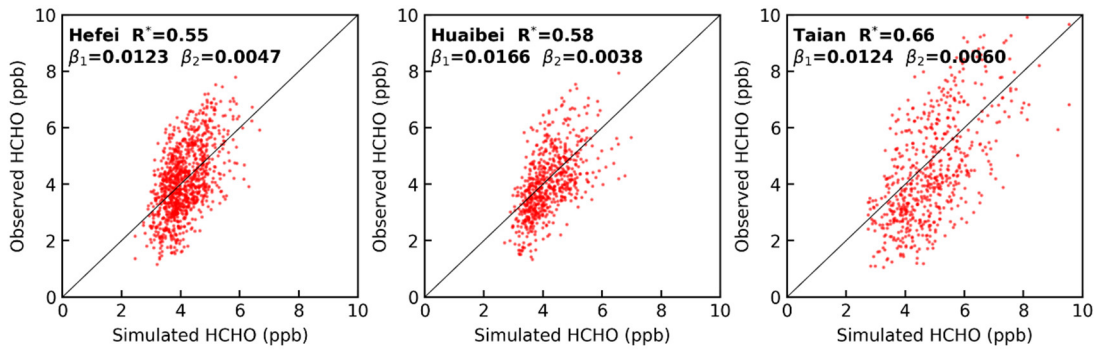

Fig.S4. Correlation analysis result of the simulated HCHO from the multi-linear regression model and measured HCHO, and the superscript asterisk indicates P<0.01.

**Tables:**

Table S1. Meteorological fields considered as possible 98% O<sub>3</sub> and 2% O<sub>3</sub> covariates

|     | Variables                    | Symbol | Average time (LT) | Units |
|-----|------------------------------|--------|-------------------|-------|
| 98% | 2-m temperature              | T2     | Maximum           | K     |
|     | Surface relative humidity    | RH     | 24 h              | %     |
|     | Total cloud cover            | TCC    | 08–18 h           | 0-1   |
|     | Total precipitation          | TP     | 24 h              | mm    |
|     | Mean sea level pressure      | MSLP   | 24 h              | Pa    |
|     | Wind speed                   | U, V   | 24 h              | m/s   |
|     | Boundary layer height        | BLH    | 08–18 h           | m     |
|     | Vertical velocity at 850 hPa | V850   | 24 h              | m/s   |
| 2%  | 2-m temperature              | T2     | Minimum           | K     |
|     | Surface relative humidity    | RH     | 19–07 h           | %     |
|     | Total precipitation          | TP     | 24 h              | mm    |
|     | Mean sea level pressure      | MSLP   | 24 h              | Pa    |
|     | Wind speed                   | U, V   | 24 h              | m/s   |
|     | Boundary layer height        | BLH    | 19–07 h           | m     |
|     | Vertical velocity at 850 hPa | V850   | 24 h              | m/s   |

5

10

15

20

25

Table S2. Meteorological drivers of 2% O<sub>3</sub> percentile and Pearson correlation coefficient between observed and modeled 2% O<sub>3</sub> percentile in each city of eastern China during May–September 2017–2022

|              | Meteorological variable |                 |                 |      |              | Meteorological variable |                 |                 |      |
|--------------|-------------------------|-----------------|-----------------|------|--------------|-------------------------|-----------------|-----------------|------|
|              | 1 <sup>st</sup>         | 2 <sup>st</sup> | 3 <sup>st</sup> | R    |              | 1 <sup>st</sup>         | 2 <sup>st</sup> | 3 <sup>st</sup> | R    |
| Taian        | T                       | RH              | U               | 0.35 | Beijing      | U                       | RH              | T               | 0.23 |
| Puyang       | T                       | BLH             | RH              | 0.50 | Tianjing     | U                       | T               | RH              | 0.32 |
| Rizhao       | U                       | V               | T               | 0.46 | Baoding      | U                       | RH              | TP              | 0.27 |
| Jining       | RH                      | T               | V               | 0.54 | Lanfang      | U                       | T               | V               | 0.23 |
| Xinxiang     | U                       | RH              | V               | 0.41 | Shijiazhuang | RH                      | BLH             | U               | 0.27 |
| Jiaozuo      | T                       | RH              | U               | 0.39 | Handan       | RH                      | V               | BLH             | 0.20 |
| Heze         | RH                      | T               | V               | 0.47 | Qinghuangdao | V                       | U               | RH              | 0.32 |
| Linyi        | RH                      | U               | TP              | 0.40 | Cangzhou     | BLH                     | T               | MSLP            | 0.28 |
| Kaifeng      | RH                      | U               | T               | 0.49 | Xingtai      | RH                      | BLH             | U               | 0.17 |
| Zhengzhou    | BLH                     | RH              | U               | 0.47 | Hengshui     | T                       | V               | RH              | 0.28 |
| Luoyang      | BLH                     | RH              | V               | 0.16 | Tangshan     | U                       | V               | RH              | 0.20 |
| Zaozhuang    | RH                      | T               | U               | 0.46 | Jinan        | V                       | BLH             | RH              | 0.59 |
| Lianyungang  | RH                      | V850            | U               | 0.37 | Qingdao      | V                       | BLH             | RH              | 0.26 |
| Shangqiu     | RH                      | T               | V               | 0.48 | Zibo         | V                       | BLH             | RH              | 0.59 |
| Xuzhou       | RH                      | BLH             | V               | 0.48 | Dongying     | U                       | V               | V850            | 0.36 |
| Xuchang      | BLH                     | RH              | U               | 0.53 | Yantai       | V                       | BLH             | U               | 0.33 |
| Suqian       | RH                      | T               | MSLP            | 0.40 | Weifang      | BLH                     | T               | U               | 0.34 |
| Huaibei      | RH                      | U               | BLH             | 0.59 | Weihai       | RH                      | U               | MSLP            | 0.36 |
| Pingdingshan | BLH                     | RH              | U               | 0.57 | Dezhou       | RH                      | V               | BLH             | 0.40 |
| Bozhou       | RH                      | V               | T               | 0.49 | Liaocheng    | BLH                     | V               | RH              | 0.48 |
| Zhoukou      | RH                      | U               | T               | 0.49 | Binzhou      | BLH                     | T               | V               | 0.23 |
| Luohe        | RH                      | U               | MSLP            | 0.45 | Shaoxing     | RH                      | BLH             | T               | 0.59 |
| Suzhou       | RH                      | U               | BLH             | 0.50 | Jinhua       | RH                      | TP              | V               | 0.60 |
| Huaian       | RH                      | V               | TP              | 0.42 | Taizhou      | V                       | RH              | U               | 0.54 |
| Yancheng     | V                       | RH              | BLH             | 0.37 | Ningbo       | RH                      | V               | TP              | 0.48 |
| Nanyang      | RH                      | U               | BLH             | 0.67 | Wuhan        | RH                      | V               | BLH             | 0.61 |
| Zhumadian    | RH                      | TP              | BLH             | 0.52 | Changsha     | RH                      | V               | BLH             | 0.71 |
| Fuyang       | RH                      | V               | U               | 0.64 | Jingzhou     | RH                      | V               | BLH             | 0.55 |
| Bengbu       | RH                      | BLH             | U               | 0.36 | Yueyang      | RH                      | BLH             | V               | 0.60 |
| Huainan      | RH                      | BLH             | U               | 0.56 | Zhuzhou      | RH                      | V               | BLH             | 0.73 |
| Xinyang      | RH                      | TP              | T               | 0.63 | Xiangtan     | RH                      | V               | BLH             | 0.72 |
| Suizhou      | RH                      | BLH             | U               | 0.63 | Yichang      | RH                      | U               | V850            | 0.64 |
| Shanghai     | RH                      | V               | TP              | 0.55 | Yiyang       | RH                      | V               | BLH             | 0.67 |
| Nanjing      | V                       | RH              | T               | 0.40 | Changde      | V                       | BLH             | RH              | 0.59 |
| Wuxi         | RH                      | V               | BLH             | 0.57 | Jingmen      | V                       | RH              | U               | 0.63 |
| Changzhou    | V                       | RH              | TP              | 0.49 | Huangshi     | RH                      | U               | V850            | 0.72 |
| Suzhou       | RH                      | V               | T               | 0.52 | Huanggang    | RH                      | U               | V850            | 0.77 |
| Nantong      | V                       | RH              | U               | 0.62 | Xianning     | RH                      | U               | MSLP            | 0.74 |
| Yangzhou     | V                       | RH              | T               | 0.52 | Xiaogan      | RH                      | V850            | BLH             | 0.68 |
| Zhenjiang    | V                       | RH              | T               | 0.55 | Quzhou       | V                       | RH              | U               | 0.68 |
| Taizhou      | V                       | RH              | T               | 0.59 | Lishui       | RH                      | V               | T               | 0.70 |
| Luan         | RH                      | V               | T               | 0.24 | Wenzhou      | RH                      | V               | U               | 0.63 |
| Hangzhou     | RH                      | V               | BLH             | 0.53 | Jiujiang     | V                       | RH              | MSLP            | 0.58 |
| Jiaxing      | RH                      | V               | T               | 0.45 | Nanchang     | V                       | RH              | V850            | 0.67 |

|           |    |    |     |      |            |      |      |     |      |
|-----------|----|----|-----|------|------------|------|------|-----|------|
| Huzhou    | V  | RH | U   | 0.61 | Jingdezhen | BLH  | V850 | T   | 0.59 |
| Hefei     | RH | TP | V   | 0.37 | Shangrao   | V850 | BLH  | RH  | 0.65 |
| Wuhu      | V  | TP | U   | 0.46 | Yingtian   | BLH  | V850 | RH  | 0.64 |
| Maanshan  | V  | U  | TP  | 0.45 | Yichun     | V850 | U    | T   | 0.63 |
| Tonglin   | V  | T  | TP  | 0.50 | Fuzhou     | RH   | V    | BLH | 0.72 |
| Anqing    | V  | T  | TP  | 0.56 | Jian       | BLH  | U    | RH  | 0.57 |
| Chuzhou   | RH | V  | BLH | 0.44 | Xinyu      | BLH  | V    | U   | 0.62 |
| Chizhou   | RH | V  | BLH | 0.47 | Pingxiang  | V850 | BLH  | T   | 0.61 |
| Xuancheng | T  | RH | U   | 0.27 | -          | -    | -    | -   | -    |

5

10

15

20

25

30

35

40

Table S3. Meteorological drivers of 98% O<sub>3</sub> percentile and Pearson correlation coefficient between observed and modeled 98% O<sub>3</sub> percentile in each city of eastern China during May–September 2017–2022

|              | Meteorological variable |                 |                 |      |              | Meteorological variable |                 |                 |      |
|--------------|-------------------------|-----------------|-----------------|------|--------------|-------------------------|-----------------|-----------------|------|
|              | 1 <sup>st</sup>         | 2 <sup>st</sup> | 3 <sup>st</sup> | R    |              | 1 <sup>st</sup>         | 2 <sup>st</sup> | 3 <sup>st</sup> | R    |
| Taian        | T                       | TP              | TCC             | 0.71 | Beijing      | MSLP                    | BLH             | V               | 0.30 |
| Puyang       | T                       | V850            | TP              | 0.79 | Tianjing     | V                       | MSLP            | BLH             | 0.27 |
| Rizhao       | T                       | U               | TCC             | 0.67 | Baoding      | MSLP                    | V               | BLH             | 0.28 |
| Jining       | T                       | TP              | V850            | 0.77 | Lanfang      | MSLP                    | BLH             | V               | 0.32 |
| Xinxiang     | T                       | TCC             | BLH             | 0.74 | Shijiazhuang | MSLP                    | BLH             | V               | 0.24 |
| Jiaozuo      | T                       | TP              | TCC             | 0.81 | Handan       | T                       | MSLP            | U               | 0.31 |
| Heze         | T                       | V850            | TP              | 0.78 | Qinghuangdao | TCC                     | U               | MSLP            | 0.36 |
| Linyi        | T                       | TP              | TCC             | 0.73 | Cangzhou     | V                       | BLH             | MSLP            | 0.35 |
| Kaifeng      | T                       | V850            | TP              | 0.78 | Xingtai      | MSLP                    | BLH             | V               | 0.25 |
| Zhengzhou    | T                       | V850            | TP              | 0.78 | Hengshui     | V                       | MSLP            | BLH             | 0.38 |
| Luoyang      | U                       | TCC             | V               | 0.28 | Tangshan     | TCC                     | MSLP            | T               | 0.27 |
| Zaozhuang    | T                       | TP              | TCC             | 0.81 | Jinan        | T                       | TP              | V850            | 0.77 |
| Lianyungang  | TCC                     | U               | TP              | 0.68 | Qingdao      | U                       | BLH             | RH              | 0.45 |
| Shangqiu     | T                       | TP              | V850            | 0.71 | Zibo         | T                       | TP              | V850            | 0.70 |
| Xuzhou       | T                       | TCC             | TP              | 0.74 | Dongying     | T                       | RH              | V               | 0.66 |
| Xuchang      | T                       | V850            | TCC             | 0.70 | Yantai       | U                       | T               | RH              | 0.44 |
| Suqian       | RH                      | TCC             | TP              | 0.74 | Weifang      | T                       | TP              | U               | 0.68 |
| Huaibei      | TCC                     | T               | TP              | 0.74 | Weihai       | U                       | T               | RH              | 0.44 |
| Pingdingshan | T                       | V850            | U               | 0.66 | Dezhou       | T                       | TP              | V850            | 0.75 |
| Bozhou       | TCC                     | T               | TP              | 0.67 | Liaocheng    | T                       | V850            | TP              | 0.77 |
| Zhoukou      | T                       | TCC             | RH              | 0.73 | Binzhou      | T                       | TP              | V               | 0.66 |
| Luohe        | T                       | V850            | RH              | 0.75 | Shaoxing     | T                       | V               | TP              | 0.66 |
| Suzhou       | TCC                     | T               | TP              | 0.71 | Jinhua       | T                       | V               | TP              | 0.59 |
| Huaian       | T                       | TCC             | TP              | 0.72 | Taizhou      | U                       | V               | T               | 0.62 |
| Yancheng     | TP                      | V850            | U               | 0.56 | Ningbo       | T                       | V               | U               | 0.69 |
| Nanyang      | T                       | TCC             | RH              | 0.74 | Wuhan        | TCC                     | RH              | V850            | 0.75 |
| Zhumadian    | TCC                     | BLH             | TP              | 0.67 | Changsha     | RH                      | TCC             | V               | 0.76 |
| Fuyang       | RH                      | TCC             | MSLP            | 0.74 | Jingzhou     | RH                      | V850            | T               | 0.84 |
| Bengbu       | T                       | TCC             | TP              | 0.72 | Yueyang      | RH                      | TCC             | U               | 0.82 |
| Huainan      | TCC                     | RH              | MSLP            | 0.68 | Zhuzhou      | RH                      | V               | T               | 0.73 |
| Xinyang      | RH                      | TCC             | U               | 0.74 | Xiangtan     | RH                      | V               | TCC             | 0.78 |
| Suizhou      | RH                      | TCC             | MSLP            | 0.75 | Yichang      | RH                      | TCC             | V850            | 0.79 |
| Shanghai     | T                       | U               | RH              | 0.72 | Yiyang       | RH                      | TCC             | V850            | 0.80 |
| Nanjing      | TCC                     | V850            | V               | 0.61 | Changde      | TCC                     | V850            | T               | 0.74 |
| Wuxi         | TP                      | TCC             | U               | 0.66 | Jingmen      | RH                      | V850            | T               | 0.76 |
| Changzhou    | TCC                     | TP              | BLH             | 0.60 | Huangshi     | RH                      | TCC             | V               | 0.76 |
| Suzhou       | T                       | TP              | U               | 0.63 | Huanggang    | TCC                     | RH              | U               | 0.72 |
| Nantong      | T                       | RH              | BLH             | 0.75 | Xianning     | RH                      | V850            | T               | 0.80 |
| Yangzhou     | TCC                     | TP              | V850            | 0.61 | Xiaogan      | RH                      | TCC             | U               | 0.72 |
| Zhenjiang    | TCC                     | TP              | MSLP            | 0.61 | Quzhou       | RH                      | V850            | T               | 0.74 |
| Taizhou      | TCC                     | V850            | U               | 0.61 | Lishui       | RH                      | U               | V               | 0.65 |
| Luan         | TCC                     | MSLP            | T               | 0.61 | Wenzhou      | U                       | RH              | V               | 0.65 |
| Hangzhou     | TP                      | TCC             | T               | 0.69 | Jiujiang     | TCC                     | V850            | RH              | 0.80 |
| Jiaxing      | T                       | TP              | U               | 0.70 | Nanchang     | RH                      | V850            | T               | 0.72 |



|           |     |      |      |      |            |      |      |     |      |
|-----------|-----|------|------|------|------------|------|------|-----|------|
| Huzhou    | TP  | TCC  | T    | 0.67 | Jingdezhen | RH   | V850 | TCC | 0.75 |
| Hefei     | TCC | TP   | V    | 0.59 | Shangrao   | TCC  | V850 | T   | 0.76 |
| Wuhu      | TCC | TP   | V    | 0.65 | Yingtian   | TCC  | V850 | T   | 0.78 |
| Maanshan  | TCC | TP   | MSLP | 0.66 | Yichun     | V850 | TCC  | T   | 0.75 |
| Tonglin   | TCC | MSLP | V    | 0.63 | Fuzhou     | V850 | T    | TCC | 0.82 |
| Anqing    | TCC | V    | TP   | 0.58 | Jian       | TCC  | T    | V   | 0.66 |
| Chuzhou   | TCC | TP   | MSLP | 0.58 | Xinyu      | V850 | TCC  | V   | 0.75 |
| Chizhou   | TCC | V    | MSLP | 0.63 | Pingxiang  | V850 | TCC  | V   | 0.75 |
| Xuancheng | TCC | V    | MSLP | 0.58 | -          | -    | -    | -   | -    |

5

10

15

20

25
